# Supplementary material for: Development and validation of prediction models for the prognosis of colon cancer with lung metastases: a population-based cohort study
Source: Frontiers journal article supplement (doi:10.3389/fendo.2023.1073360), 2023-07-31
Supplement: Data_Sheet_1.PDF [file Data_Sheet_1.PDF]

# **Development and validation of prediction models for the prognosis of colon cancer with lung metastases: A population-based cohort study**

**Zhenyu Ma<sup>1</sup>, Shuping Yang<sup>1</sup>, Yalin Yang<sup>1</sup>, Jingran Luo<sup>1</sup>, Yixiao Zhou<sup>1</sup>, Huiyong Yang<sup>1\*</sup>**

<sup>1</sup>School of Medicine, Huaqiao University, Quanzhou 362021, China

**\* Correspondence:**

Corresponding author: Huiyong Yang

E-mail: baiqingyang\_78@163.com

**Table S1.** Comparison of clinicopathological features and treatment options between cohorts CCLM without extrapulmonary metastases and CCLM with extrapulmonary metastases.

| Variable              | Overall patients<br>(N = 1284) | CCLM without<br>extrapulmonary<br>metastases<br>(N = 418) | CCLM with<br>extrapulmonary<br>metastases<br>(N = 866) | $\chi^2$ | P value |
|-----------------------|--------------------------------|-----------------------------------------------------------|--------------------------------------------------------|----------|---------|
| <b>Age</b>            |                                |                                                           |                                                        |          |         |
| < 65                  | 635 (49.5%)                    | 194 (46.4%)                                               | 441 (50.9%)                                            | 2.12     | 0.15    |
| ≥ 65                  | 649 (50.5%)                    | 224 (53.6%)                                               | 425 (49.1%)                                            |          |         |
| <b>Sex</b>            |                                |                                                           |                                                        |          |         |
| Female                | 628 (48.9%)                    | 219 (52.4%)                                               | 409 (47.2%)                                            | 2.81     | 0.09    |
| Male                  | 656 (51.1%)                    | 199 (47.6%)                                               | 457 (52.8%)                                            |          |         |
| <b>Race</b>           |                                |                                                           |                                                        |          |         |
| White                 | 922 (71.8%)                    | 290 (69.4%)                                               | 632 (73.0%)                                            | 1.82     | 0.40    |
| Black                 | 219 (17.1%)                    | 77 (18.4%)                                                | 142 (16.4%)                                            |          |         |
| Others*               | 143 (11.1%)                    | 51 (12.2%)                                                | 92 (10.6%)                                             |          |         |
| <b>Primary site</b>   |                                |                                                           |                                                        |          |         |
| Ascending colon       | 224 (17.4%)                    | 75 (17.9%)                                                | 149 (17.2%)                                            | 3.86     | 0.43    |
| Transverse colon      | 117 (9.1%)                     | 41 (9.8%)                                                 | 76 (8.8%)                                              |          |         |
| Descending colon      | 85 (6.6%)                      | 34 (8.1%)                                                 | 51 (5.9%)                                              |          |         |
| Sigmoid colon         | 415 (32.3%)                    | 135 (32.3%)                                               | 280 (32.3%)                                            |          |         |
| Others**              | 443 (34.5%)                    | 133 (31.8%)                                               | 310 (35.8%)                                            |          |         |
| <b>Tumor grade</b>    |                                |                                                           |                                                        |          |         |
| I-II                  | 939 (73.1%)                    | 308 (73.7%)                                               | 631 (72.9%)                                            | 0.06     | 0.81    |
| III-IV                | 345 (26.9%)                    | 110 (26.3%)                                               | 235 (27.1%)                                            |          |         |
| <b>AJCC T stage</b>   |                                |                                                           |                                                        |          |         |
| T1-T3                 | 725 (56.5%)                    | 252 (60.3%)                                               | 473 (54.6%)                                            | 3.46     | 0.06    |
| T4                    | 559 (43.5%)                    | 166 (39.7%)                                               | 393 (45.4%)                                            |          |         |
| <b>AJCC N stage</b>   |                                |                                                           |                                                        |          |         |
| N0-N1                 | 672 (52.3%)                    | 255 (61.0%)                                               | 417 (48.2%)                                            | 18.16    | < 0.01  |
| N2                    | 612 (47.7%)                    | 163 (39.0%)                                               | 449 (51.8%)                                            |          |         |
| <b>Radiotherapy</b>   |                                |                                                           |                                                        |          |         |
| No/unknown            | 1209 (94.2%)                   | 405 (96.9%)                                               | 804 (92.8%)                                            | 7.68     | < 0.01  |
| Yes                   | 75 (5.8%)                      | 13 (3.1%)                                                 | 62 (7.2%)                                              |          |         |
| <b>Chemotherapy</b>   |                                |                                                           |                                                        |          |         |
| No/unknown            | 369 (28.7%)                    | 138 (33.0%)                                               | 231 (26.7%)                                            | 5.23     | 0.02    |
| Yes                   | 915 (71.3%)                    | 280 (67.0%)                                               | 635 (73.3%)                                            |          |         |
| <b>CEA</b>            |                                |                                                           |                                                        |          |         |
| Negative              | 232 (18.1%)                    | 140 (33.5%)                                               | 92 (10.6%)                                             | 98.06    | < 0.01  |
| Positive              | 1052 (81.9%)                   | 278 (66.5%)                                               | 774 (89.4%)                                            |          |         |
| <b>Marital status</b> |                                |                                                           |                                                        |          |         |
| Married               | 697 (54.3%)                    | 210 (50.2%)                                               | 487 (56.2%)                                            | 3.85     | 0.05    |
| Unmarried             | 587 (45.7%)                    | 208 (49.8%)                                               | 379 (43.8%)                                            |          |         |

|                                    |              |             |             |      |      |
|------------------------------------|--------------|-------------|-------------|------|------|
| <b>Tumor size</b>                  |              |             |             |      |      |
| < 5cm                              | 520 (40.5%)  | 177 (42.3%) | 343 (39.6%) | 1.98 | 0.37 |
| 5-10cm                             | 117 (9.1%)   | 209 (50.0%) | 438 (50.6%) |      |      |
| > 10cm                             | 647 (50.4%)  | 32 (7.7%)   | 85 (9.8%)   |      |      |
| <b>Bone metastasis</b>             |              |             |             |      |      |
| No                                 | 1197 (93.2%) | 418 (100%)  | 779 (90.0%) | NA   | NA   |
| Yes                                | 87 (6.8%)    | 0 (0%)      | 87 (10.0%)  |      |      |
| <b>Brain metastasis</b>            |              |             |             |      |      |
| No                                 | 1256 (97.8%) | 418 (100%)  | 838 (96.8%) | NA   | NA   |
| Yes                                | 28 (2.2%)    | 0 (0%)      | 28 (3.2%)   |      |      |
| <b>Liver metastasis</b>            |              |             |             |      |      |
| No                                 | 449 (35.0%)  | 418 (100%)  | 31 (3.6%)   | NA   | NA   |
| Yes                                | 835 (65.0%)  | 0 (0%)      | 835 (96.4%) |      |      |
| <b>Tumor number</b>                |              |             |             |      |      |
| Single                             | 1025 (79.8%) | 322 (77.0%) | 703 (81.2%) | 2.76 | 0.10 |
| Multiple                           | 259 (20.2%)  | 96 (23.0%)  | 163 (18.8%) |      |      |
| <b>Surgery sites</b>               |              |             |             |      |      |
| Only primary site                  | 1026 (79.9%) | 354 (84.7%) | 672 (77.6%) | 8.93 | 0.01 |
| Primary & other sites <sup>†</sup> | 255 (19.9%)  | 63 (15.1%)  | 192 (22.2%) |      |      |
| No surgery                         | 3 (0.2%)     | 1 (0.2%)    | 2 (0.2%)    |      |      |
| <b>Histological type</b>           |              |             |             |      |      |
| Adenocarcinoma                     | 1170 (91.1%) | 374 (89.5%) | 796 (91.9%) | 1.79 | 0.18 |
| Others <sup>‡</sup>                | 114 (8.9%)   | 44 (10.5%)  | 70 (8.1%)   |      |      |

\*Asian or Pacific Islander, American Indian/Alaska Native; \*\* Cecum, appendix, hepatic flexure of colon, splenic flexure of colon, and overlapping lesion of colon; <sup>†</sup> Surgery of other sites describes the surgical removal of distant lymph nodes or other tissues or organs beyond the primary site; <sup>‡</sup> Cystic, mucinous and serous neoplasms, ductal and lobular neoplasms, complex epithelial neoplasms; CEA = carcino-embryonic antigen.

**Table S2.** Summary of the OS and CSS status stratified by different risk factors in all 1284 patients.

| Varibales  | Entire cohort, No. | Overall survival |                                         |               |                                       |          | Cancer-specific survival |                                         |               |                                        |          |
|------------|--------------------|------------------|-----------------------------------------|---------------|---------------------------------------|----------|--------------------------|-----------------------------------------|---------------|----------------------------------------|----------|
|            |                    | Low-risk         |                                         | High-risk     |                                       | P value  | Low-risk                 |                                         | High-risk     |                                        | P value  |
|            |                    | Patients, No.    | Survival status                         | Patients, No. | Survival status                       |          | Patients, No.            | Survival status                         | Patients, No. | Survival status                        |          |
| I-II       | 939                | 605              | Alive: 107 (17.7%)<br>Dead: 498 (82.3%) | 334           | Alive: 18 (5.4%)<br>Dead: 316 (94.6%) | < 0.0001 | 605                      | Alive: 143 (23.6%)<br>Dead: 462 (76.4%) | 334           | Alive: 34 (10.2%)<br>Dead: 300 (89.8%) | < 0.0001 |
| III-IV     | 345                | 64               | Alive: 11 (17.2%)<br>Dead: 53 (82.8%)   | 281           | Alive: 14 (5.0%)<br>Dead: 267 (95.0%) | 0.0017   | 64                       | Alive: 13 (20.3%)<br>Dead: 51 (79.7%)   | 281           | Alive: 34 (12.1%)<br>Dead: 247 (87.9%) | 0.1268   |
| T1-T3      | 725                | 464              | Alive: 90 (19.4%)<br>Dead: 374 (80.6%)  | 261           | Alive: 21 (8.0%)<br>Dead: 240 (92.0%) | < 0.0001 | 464                      | Alive: 116 (25.0%)<br>Dead: 348 (75.0%) | 261           | Alive: 39 (14.9%)<br>Dead: 222 (85.1%) | 0.0021   |
| T4         | 559                | 205              | Alive: 28 (13.7%)<br>Dead: 177 (86.3%)  | 354           | Alive: 11 (3.1%)<br>Dead: 343 (96.9%) | < 0.0001 | 205                      | Alive: 40 (19.5%)<br>Dead: 165 (80.5%)  | 354           | Alive: 29 (8.2%)<br>Dead: 325 (91.8%)  | 0.0002   |
| N0-N1      | 672                | 458              | Alive: 93 (20.3%)<br>Dead: 365 (79.7%)  | 214           | Alive: 16 (7.5%)<br>Dead: 198 (92.5%) | < 0.0001 | 458                      | Alive: 124 (27.1%)<br>Dead: 334 (72.9%) | 214           | Alive: 36 (16.8%)<br>Dead: 178 (83.2%) | 0.0050   |
| N2         | 612                | 211              | Alive: 25 (11.8%)<br>Dead: 186 (88.2%)  | 401           | Alive: 16 (4.0%)<br>Dead: 385 (96.0%) | 0.0004   | 211                      | Alive: 32 (15.2%)<br>Dead: 179 (84.8%)  | 401           | Alive: 32 (8.0%)<br>Dead: 369 (92.0%)  | 0.0087   |
| No/unknown | 369                | 16               | Alive: 4 (25.0%)<br>Dead: 12 (75.0%)    | 353           | Alive: 20 (5.7%)<br>Dead: 333 (94.3%) | 0.0108   | 16                       | Alive: 9 (56.3%)<br>Dead: 7 (43.7%)     | 353           | Alive: 47 (13.3%)<br>Dead: 306 (86.7%) | < 0.0001 |
| Yes        | 915                | 653              | Alive: 114 (17.5%)<br>Dead: 539 (82.5%) | 262           | Alive: 12 (4.6%)<br>Dead: 250 (95.4%) | < 0.0001 | 653                      | Alive: 147 (22.5%)<br>Dead: 506 (77.5%) | 262           | Alive: 21 (8.0%)<br>Dead: 241 (92.0%)  | < 0.0001 |
| Negative   | 232                | 153              | Alive: 42 (27.5%)<br>Dead: 111 (72.5%)  | 79            | Alive: 7 (8.9%)<br>Dead: 72 (91.1%)   | 0.0018   | 153                      | Alive: 53 (34.6%)<br>Dead: 100 (65.4%)  | 79            | Alive: 12 (15.2%)<br>Dead: 67 (84.8%)  | 0.0030   |
| Positive   | 1052               | 516              | Alive: 76 (14.7%)<br>Dead: 440 (85.3%)  | 536           | Alive: 25 (4.7%)<br>Dead: 511 (95.3%) | < 0.0001 | 516                      | Alive: 103 (20.0%)<br>Dead: 413 (80.0%) | 536           | Alive: 56 (10.4%)<br>Dead: 480 (89.6%) | < 0.0001 |

|     |     |     |                                        |     |                                       |          |     |                                         |     |                                        |          |
|-----|-----|-----|----------------------------------------|-----|---------------------------------------|----------|-----|-----------------------------------------|-----|----------------------------------------|----------|
| No  | 449 | 298 | Alive: 87 (29.2%)<br>Dead: 211 (70.8%) | 151 | Alive: 15 (9.9%)<br>Dead: 136 (90.1%) | < 0.0001 | 298 | Alive: 107 (35.9%)<br>Dead: 191 (64.1%) | 151 | Alive: 25 (16.6%)<br>Dead: 126 (83.4%) | < 0.0001 |
| Yes | 835 | 371 | Alive: 31 (8.4%)<br>Dead: 340 (91.6%)  | 464 | Alive: 17 (3.7%)<br>Dead: 447 (96.3%) | 0.0061   | 371 | Alive: 49 (13.2%)<br>Dead: 322 (86.8%)  | 464 | Alive: 43 (9.3%)<br>Dead: 421 (90.7%)  | 0.0900   |

**Table S3.** The results of survival analysis for all 1284 cases with CCLM stratified by different risk factors in low-risk and high-risk groups.

| Subgroups                 | Overall survival  |                | Cancer-specific survival |                |
|---------------------------|-------------------|----------------|--------------------------|----------------|
|                           | HR (95% CI)       | <i>P</i> value | HR (95% CI)              | <i>P</i> value |
| Grade (I-II)              | 2.22 (1.88, 2.62) | < 0.0001       | 2.28 (1.92, 2.71)        | < 0.0001       |
| Grade (III-IV)            | 2.06 (1.62, 2.63) | < 0.0001       | 1.99 (1.55, 2.55)        | < 0.0001       |
| AJCC T stage (T1-T3)      | 2.20 (1.62, 2.63) | < 0.0001       | 2.21 (1.81, 2.69)        | < 0.0001       |
| AJCC T stage (T4)         | 2.11 (1.78, 2.51) | < 0.0001       | 2.16 (1.81, 2.58)        | < 0.0001       |
| AJCC N stage (N0-N1)      | 2.34 (1.89, 2.89) | < 0.0001       | 2.32 (1.86, 2.89)        | < 0.0001       |
| AJCC N stage (N2)         | 1.94 (1.65, 2.29) | < 0.0001       | 1.94 (1.64, 2.30)        | < 0.0001       |
| Chemotherapy (No/unknown) | 2.14 (1.42, 3.22) | 0.0051         | 3.39 (2.21, 5.20)        | 0.00035        |
| Chemotherapy (Yes)        | 1.92 (1.61, 2.30) | < 0.0001       | 1.98 (1.65, 2.37)        | < 0.0001       |
| CEA (Negative)            | 2.36 (1.66, 3.36) | < 0.0001       | 2.49 (1.72, 3.60)        | < 0.0001       |
| CEA (Positive)            | 2.15 (1.88, 2.45) | < 0.0001       | 2.15 (1.88, 2.47)        | < 0.0001       |
| Liver metastasis (No)     | 2.59 (1.99, 3.37) | < 0.0001       | 2.68 (2.03, 3.54)        | < 0.0001       |
| Liver metastasis (Yes)    | 1.87 (1.63, 2.16) | < 0.0001       | 1.87 (1.62, 2.16)        | < 0.0001       |

**Table S4.** Baseline characteristics of all 3115 patients in expanded testing set.

| Variable                               | Overall patients<br>(N = 3115) |
|----------------------------------------|--------------------------------|
| <b>Tumor grade</b>                     |                                |
| I-II                                   | 2398 (77.0%)                   |
| III-IV                                 | 717 (23.0%)                    |
| <b>AJCC T stage</b>                    |                                |
| T1-T3                                  | 2070 (66.5%)                   |
| T4                                     | 1045 (33.5%)                   |
| <b>AJCC N stage</b>                    |                                |
| N0-N1                                  | 2167 (69.6%)                   |
| N2                                     | 948 (30.4%)                    |
| <b>Chemotherapy</b>                    |                                |
| No/unknown                             | 730 (23.4%)                    |
| Yes                                    | 2385 (76.6%)                   |
| <b>CEA</b>                             |                                |
| Negative                               | 548 (17.6%)                    |
| Positive                               | 2567 (82.4%)                   |
| <b>Liver metastasis</b>                |                                |
| No                                     | 1055 (33.9%)                   |
| Yes                                    | 2060 (66.1%)                   |
| <b>Overall survival status</b>         |                                |
| Alive                                  | 345 (11.1%)                    |
| Dead                                   | 2770 (88.9%)                   |
| <b>Cancer-specific survival status</b> |                                |
| Alive                                  | 519 (16.7%)                    |
| Dead                                   | 2596 (83.3%)                   |
| <b>Survival months</b>                 |                                |
| Median (interquartile range [IQR])     | 17 (6-32)                      |

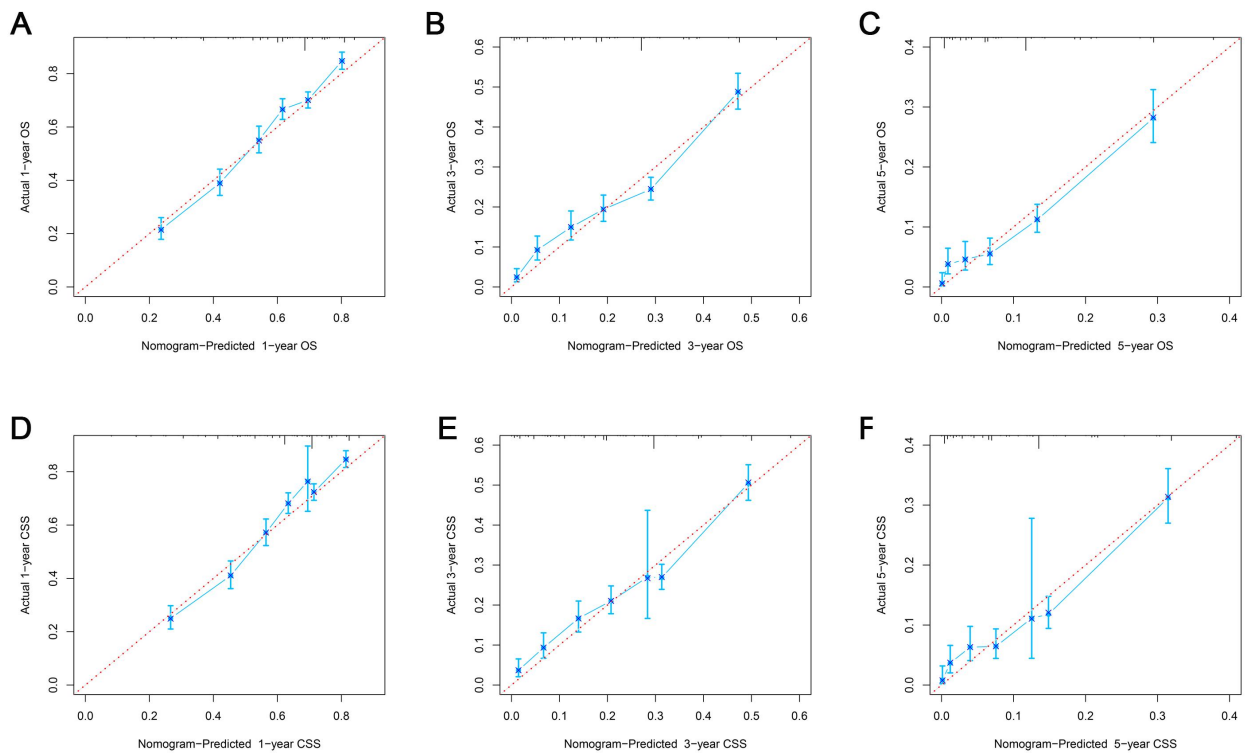

**Figure S1.** Calibration curves of 1-, 3-, 5-year OS (A, B, C) and CSS (D, E, F) in expanded testing set.



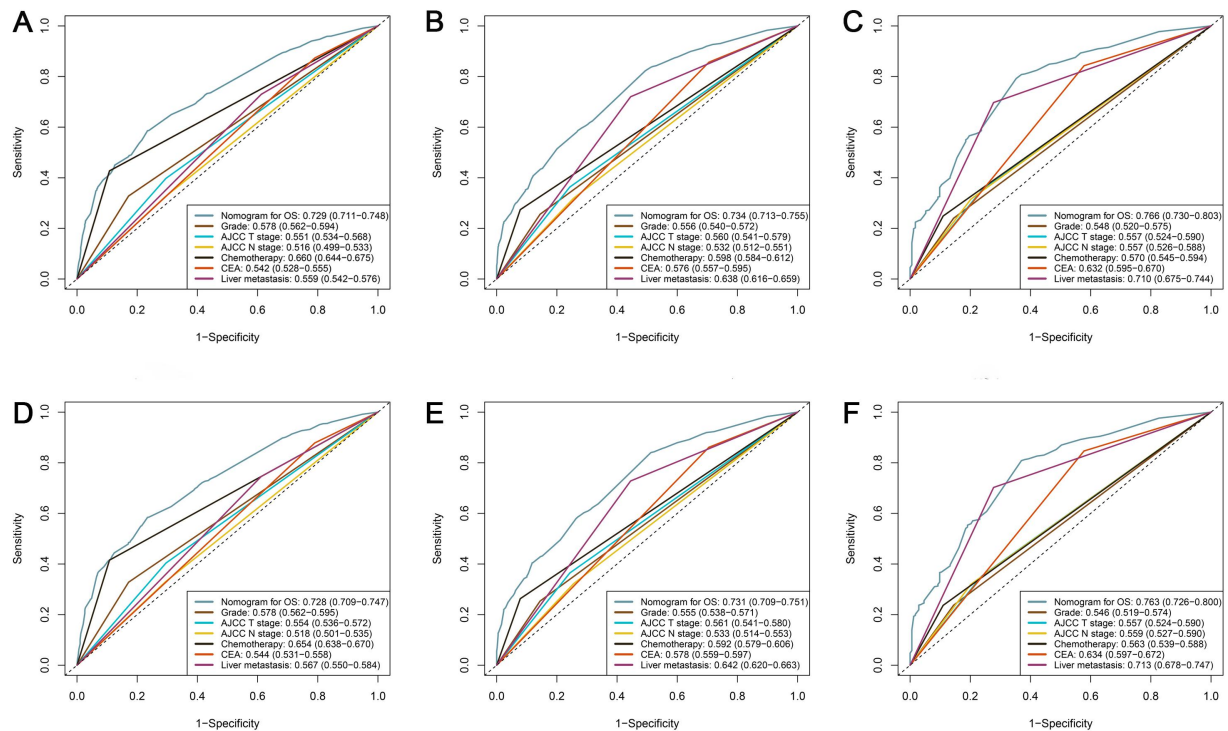

**Figure S2.** Time-dependent ROC curves comparing the prognostic accuracy of the 1-, 3-, 5-year OS (A, B, C) and CSS (D, E, F) prediction model with clinical risk factors in expanded testing set.

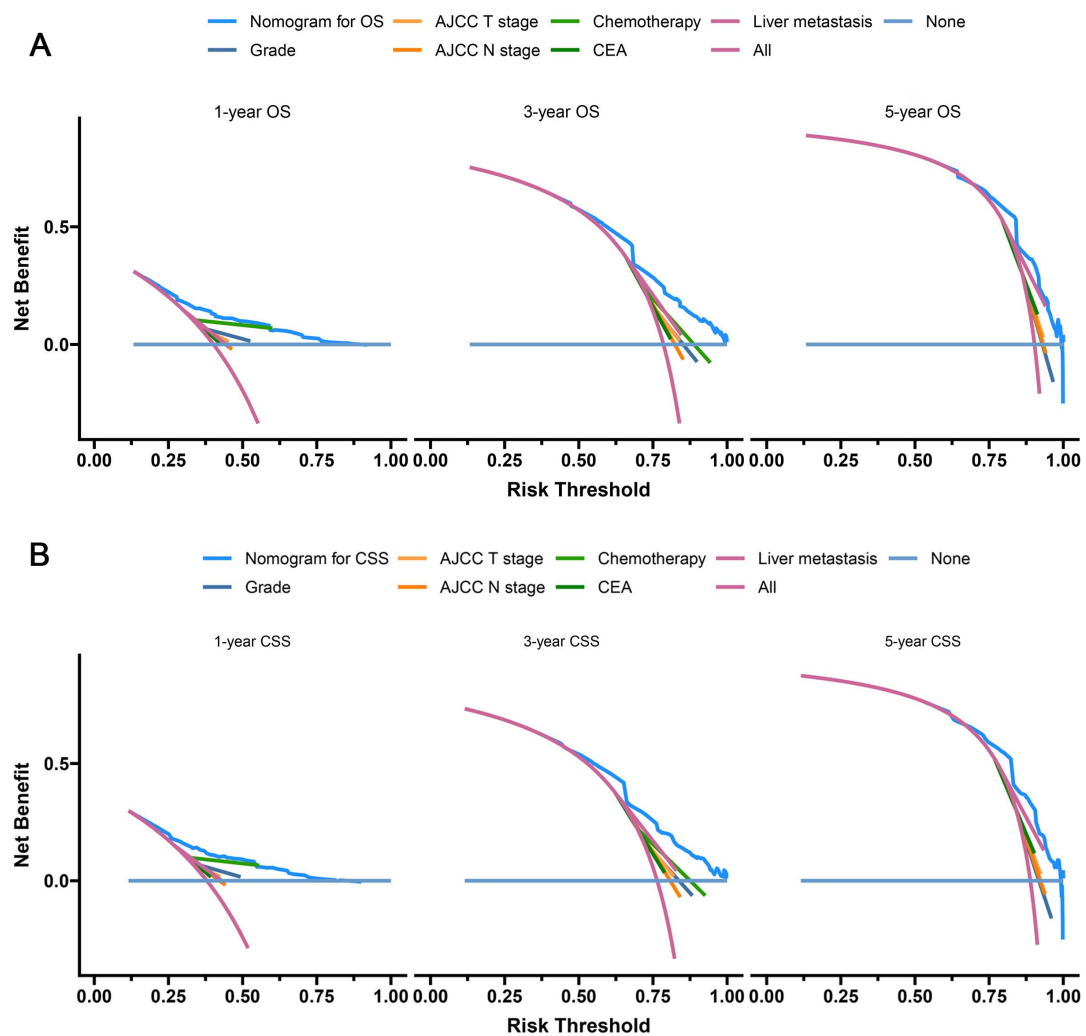

**Figure S3.** Decision curves of the OS (A) and CSS (B) prediction model in expanded testing set.

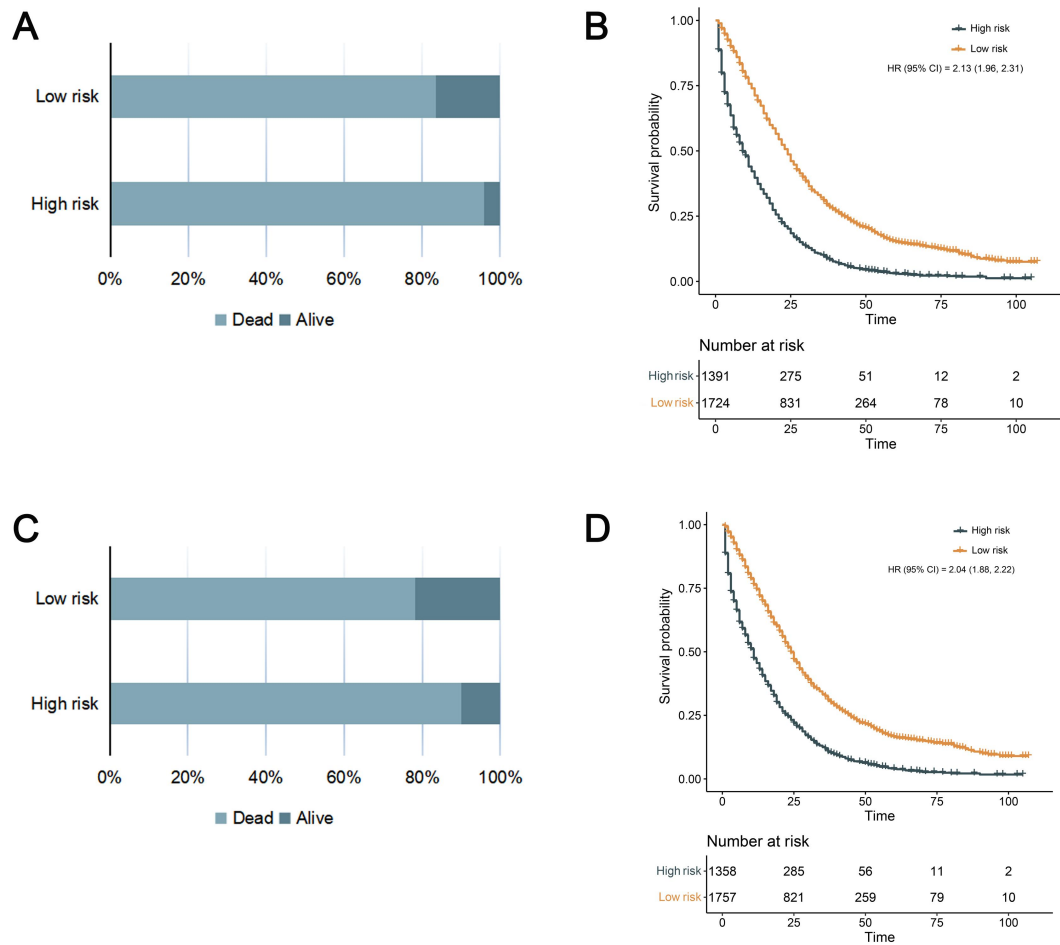

**Figure S4.** The OS (A) and CSS (C) status of 3115 CCLM patients between low-risk and high-risk groups in expanded testing set. Kaplan-Meier curves for OS (B) and CSS (D) of 3115 patients with CCLM between low-risk and high-risk groups in expanded testing set.
